# Supplementary material for: Trajectories of physical activity and sedentary time in Norwegian children aged 3–9 years: a 5-year longitudinal study
Source: PubMed Central journal article supplement (PMC9188121; doi:10.1186/s12966-022-01286-0), 2022-06-11
Supplement: 12966_2022_1286_MOESM1_ESM.pdf [file 12966_2022_1286_MOESM1_ESM.pdf]

**Supplemental Table 1.** Mean (SD) PA levels (percentage of wear time) for the total day across age and sex using a 1-second epoch length.

|                     | Age          |            |            |            |            |            |            |
|---------------------|--------------|------------|------------|------------|------------|------------|------------|
|                     | 3            | 4          | 5          | 6          | 7          | 8          | 9          |
|                     | <b>Boys</b>  |            |            |            |            |            |            |
| Wear days (n)       | 12.9 (1.5)   | 12.7 (1.8) | 12.3 (2.1) | 12.6 (3.0) | 12.4 (2.8) | 12.1 (2.6) | 12.4 (2.1) |
| Wear time (min/day) | 688 (39)     | 695 (32)   | 709 (38)   | 727 (51)   | 729 (45)   | 741 (41)   | 761 (41)   |
| Total PA (cpm)      | 641 (99)     | 743 (162)  | 774 (182)  | 754 (182)  | 742 (167)  | 720 (188)  | 656 (172)  |
| SED (%)             | 68.4 (3.4)   | 67.4 (3.9) | 67.6 (4.2) | 68.9 (4.2) | 70.1 (3.7) | 71.7 (4.2) | 74.0 (4.1) |
| LPA (%)             | 22.3 (2.4)   | 21.9 (2.4) | 21.1 (2.4) | 20.0 (2.5) | 18.8 (2.1) | 17.5 (2.4) | 16.1 (2.0) |
| MPA (%)             | 5.0 (0.9)    | 5.5 (0.9)  | 5.7 (1.0)  | 5.6 (1.0)  | 5.6 (1.1)  | 5.3 (1.1)  | 5.0 (1.2)  |
| VPA (%)             | 4.2 (0.9)    | 5.1 (1.3)  | 5.6 (1.6)  | 5.5 (1.6)  | 5.5 (1.8)  | 5.5 (1.8)  | 4.9 (1.5)  |
| MVPA (%)            | 9.3 (1.6)    | 10.7 (2.1) | 11.3 (2.4) | 11.1 (2.4) | 11.1 (2.4) | 10.8 (2.7) | 9.9 (2.5)  |
|                     | <b>Girls</b> |            |            |            |            |            |            |
| Wear days (n)       | 12.7 (1.7)   | 12.8 (1.9) | 12.6 (2.2) | 12.3 (2.6) | 12.6 (3.0) | 11.8 (2.4) | 12.0 (2.3) |
| Wear time (min/day) | 665 (49)     | 696 (39)   | 701 (36)   | 708 (38)   | 721 (38)   | 732 (40)   | 751 (50)   |
| Total PA (cpm)      | 625 (141)    | 693 (150)  | 720 (146)  | 695 (153)  | 704 (156)  | 633 (150)  | 603 (104)  |
| SED (%)             | 69.9 (4.1)   | 69.4 (3.7) | 70.0 (3.6) | 71.1 (3.8) | 72.0 (3.5) | 74.0 (3.8) | 75.3 (3.2) |
| LPA (%)             | 21.3 (2.9)   | 20.7 (2.1) | 19.9 (2.3) | 18.9 (2.3) | 18.0 (2.0) | 16.8 (2.4) | 15.8 (2.1) |
| MPA (%)             | 4.7 (0.8)    | 5.1 (0.8)  | 5.0 (0.7)  | 5.0 (0.9)  | 4.9 (0.9)  | 4.6 (0.9)  | 4.6 (0.9)  |
| VPA (%)             | 4.1 (1.1)    | 4.8 (1.3)  | 5.1 (1.2)  | 5.0 (1.3)  | 5.1 (1.3)  | 4.5 (1.2)  | 4.3 (0.9)  |
| MVPA (%)            | 8.8 (1.8)    | 9.9 (2.0)  | 10.1 (1.8) | 10.0 (2.1) | 10.0 (2.0) | 9.2 (1.9)  | 8.9 (1.6)  |

PA = physical activity; SED = sedentary time; LPA = light physical activity; MPA = moderate physical activity; VPA = vigorous physical activity; MVPA = moderate- to vigorous physical activity

**Supplemental Table 2.** Mean (SD) PA levels for weekdays across age and sex using a 1-second epoch length.

|                     | Age          |           |           |           |           |           |           |
|---------------------|--------------|-----------|-----------|-----------|-----------|-----------|-----------|
|                     | 3            | 4         | 5         | 6         | 7         | 8         | 9         |
|                     | <b>Boys</b>  |           |           |           |           |           |           |
| Wear days (n)       | 9.3 (0.9)    | 9.3 (1.2) | 9.0 (1.5) | 9.3 (2.1) | 9.2 (2.1) | 8.9 (1.8) | 9.1 (1.5) |
| Wear time (min/day) | 704 (46)     | 711 (36)  | 726 (40)  | 745 (49)  | 747 (43)  | 760 (42)  | 774 (42)  |
| Total PA (cpm)      | 639 (99)     | 746 (171) | 795 (192) | 770 (193) | 749 (156) | 734 (181) | 685 (178) |
| SED (min/day)       | 481 (40)     | 478 (37)  | 487 (43)  | 510 (52)  | 521 (43)  | 542 (48)  | 567 (48)  |
| LPA (min/day)       | 158 (19)     | 157 (19)  | 155 (19)  | 150 (20)  | 142 (17)  | 134 (18)  | 127 (15)  |
| MPA (min/day)       | 35 (7)       | 40 (7)    | 42 (8)    | 43 (8)    | 42 (8)    | 41 (8)    | 40 (10)   |
| VPA (min/day)       | 30 (7)       | 37 (10)   | 42 (12)   | 42 (12)   | 41 (12)   | 42 (13)   | 40 (12)   |
| MVPA (min/day)      | 65 (12)      | 76 (16)   | 83 (18)   | 84 (19)   | 84 (18)   | 84 (19)   | 80 (20)   |
|                     | <b>Girls</b> |           |           |           |           |           |           |
| Wear days (n)       | 9.5 (0.9)    | 9.3 (1.3) | 9.2 (1.4) | 9.2 (1.8) | 9.3 (1.7) | 8.7 (1.7) | 8.8 (1.6) |
| Wear time (min/day) | 675 (47)     | 712 (42)  | 718 (36)  | 729 (42)  | 741 (40)  | 755 (42)  | 776 (53)  |
| Total PA (cpm)      | 628 (121)    | 704 (159) | 732 (149) | 705 (154) | 717 (152) | 653 (145) | 622 (115) |
| SED (min/day)       | 471 (43)     | 492 (40)  | 501 (40)  | 516 (43)  | 531 (41)  | 556 (41)  | 582 (48)  |
| LPA (min/day)       | 145 (22)     | 148 (18)  | 144 (18)  | 139 (18)  | 134 (16)  | 128 (21)  | 123 (20)  |
| MPA (min/day)       | 32 (5)       | 36 (7)    | 36 (5)    | 37 (7)    | 37 (7)    | 36 (7)    | 36 (8)    |
| VPA (min/day)       | 28 (7)       | 35 (10)   | 37 (9)    | 37 (10)   | 39 (10)   | 36 (9)    | 34 (7)    |
| MVPA (min/day)      | 59 (11)      | 71 (16)   | 74 (13)   | 74 (15)   | 76 (15)   | 71 (15)   | 71 (13)   |

PA = physical activity; SED = sedentary time; LPA = light physical activity; MPA = moderate physical activity; VPA = vigorous physical activity; MVPA = moderate- to vigorous physical activity

**Supplemental Table 3.** Mean (SD) PA levels for weekend days across age and sex using a 1-second epoch length.

|                     | Age          |           |           |           |           |           |           |
|---------------------|--------------|-----------|-----------|-----------|-----------|-----------|-----------|
|                     | 3            | 4         | 5         | 6         | 7         | 8         | 9         |
|                     | <b>Boys</b>  |           |           |           |           |           |           |
| Wear days (n)       | 3.6 (1.1)    | 3.4 (1.0) | 3.3 (1.2) | 3.3 (1.3) | 3.3 (1.1) | 3.2 (1.2) | 3.3 (1.0) |
| Wear time (min/day) | 645 (48)     | 648 (50)  | 655 (68)  | 671 (81)  | 680 (75)  | 687 (77)  | 721 (74)  |
| Total PA (cpm)      | 654 (152)    | 737 (188) | 730 (212) | 726 (235) | 725 (260) | 694 (268) | 582 (223) |
| SED (min/day)       | 440 (50)     | 440 (48)  | 453 (62)  | 472 (79)  | 487 (78)  | 501 (77)  | 551 (75)  |
| LPA (min/day)       | 144 (26)     | 141 (24)  | 133 (24)  | 129 (23)  | 122 (23)  | 116 (24)  | 109 (25)  |
| MPA (min/day)       | 33 (7)       | 35 (8)    | 36 (10)   | 35 (9)    | 35 (11)   | 34 (10)   | 31 (10)   |
| VPA (min/day)       | 28 (7)       | 32 (9)    | 34 (12)   | 35 (13)   | 36 (15)   | 36 (17)   | 31 (14)   |
| MVPA (min/day)      | 61 (14)      | 67 (16)   | 70 (20)   | 70 (20)   | 71 (24)   | 70 (26)   | 61 (23)   |
|                     | <b>Girls</b> |           |           |           |           |           |           |
| Wear days (n)       | 3.1 (1.1)    | 3.4 (1.1) | 3.4 (1.1) | 3.2 (1.2) | 3.3 (1.2) | 3.1 (1.1) | 3.2 (1.1) |
| Wear time (min/day) | 631 (82)     | 651 (63)  | 652 (61)  | 646 (61)  | 666 (73)  | 667 (68)  | 675 (82)  |
| Total PA (cpm)      | 638 (219)    | 670 (179) | 694 (212) | 667 (205) | 663 (232) | 572 (198) | 564 (143) |
| SED (min/day)       | 445 (72)     | 456 (59)  | 464 (61)  | 466 (60)  | 486 (72)  | 503 (63)  | 513 (66)  |
| LPA (min/day)       | 132 (29)     | 133 (20)  | 125 (22)  | 119 (22)  | 119 (22)  | 109 (21)  | 106 (23)  |
| MPA (min/day)       | 29 (9)       | 32 (7)    | 31 (8)    | 31 (9)    | 30 (9)    | 28 (8)    | 29 (9)    |
| VPA (min/day)       | 26 (11)      | 29 (10)   | 31 (10)   | 31 (11)   | 31 (12)   | 27 (10)   | 27 (9)    |
| MVPA (min/day)      | 55 (19)      | 62 (16)   | 62 (17)   | 61 (19)   | 61 (19)   | 54 (17)   | 56 (18)   |

PA = physical activity; SED = sedentary time; LPA = light physical activity; MPA = moderate physical activity; VPA = vigorous physical activity; MVPA = moderate- to vigorous physical activity

**Supplemental Table 4.** Mean (SD) PA levels for preschool/school hours across age and sex using a 1-second epoch length.

|                     | Age          |           |           |           |           |           |           |
|---------------------|--------------|-----------|-----------|-----------|-----------|-----------|-----------|
|                     | 3            | 4         | 5         | 6         | 7         | 8         | 9         |
|                     | <b>Boys</b>  |           |           |           |           |           |           |
| Wear days (n)       | 9.4 (1.0)    | 9.5 (1.2) | 9.2 (1.5) | 9.6 (2.0) | 9.4 (2.0) | 8.9 (1.8) | 9.1 (1.5) |
| Wear time (min/day) | 402 (22)     | 412 (10)  | 413 (11)  | 412 (11)  | 411 (9)   | 411 (8)   | 409 (9)   |
| Total PA (cpm)      | 676 (120)    | 820 (226) | 882 (229) | 841 (250) | 824 (190) | 804 (215) | 745 (172) |
| SED (min/day)       | 266 (17)     | 263 (20)  | 262 (21)  | 269 (21)  | 275 (18)  | 282 (20)  | 288 (19)  |
| LPA (min/day)       | 97 (15)      | 100 (14)  | 97 (12)   | 91 (14)   | 85 (10)   | 78 (12)   | 73 (10)   |
| MPA (min/day)       | 22 (4)       | 26 (5)    | 27 (5)    | 27 (6)    | 26 (6)    | 25 (6)    | 25 (6)    |
| VPA (min/day)       | 18 (4)       | 24 (8)    | 27 (9)    | 26 (9)    | 26 (8)    | 26 (9)    | 23 (7)    |
| MVPA (min/day)      | 40 (8)       | 49 (12)   | 54 (13)   | 52 (14)   | 52 (13)   | 51 (13)   | 48 (12)   |
|                     | <b>Girls</b> |           |           |           |           |           |           |
| Wear days (n)       | 9.6 (0.9)    | 9.7 (1.2) | 9.4 (1.4) | 9.4 (1.8) | 9.5 (2.2) | 8.9 (1.8) | 9.0 (1.6) |
| Wear time (min/day) | 401 (20)     | 411 (13)  | 411 (13)  | 411 (10)  | 411 (9)   | 409 (10)  | 407 (8)   |
| Total PA (cpm)      | 668 (131)    | 756 (191) | 790 (177) | 771 (191) | 768 (175) | 725 (187) | 670 (147) |
| SED (min/day)       | 271 (19)     | 274 (19)  | 276 (18)  | 281 (19)  | 287 (16)  | 293 (15)  | 299 (17)  |
| LPA (min/day)       | 92 (14)      | 92 (11)   | 89 (12)   | 84 (11)   | 78 (10)   | 73 (12)   | 67 (11)   |
| MPA (min/day)       | 21 (4)       | 23 (4)    | 23 (4)    | 23 (5)    | 22 (5)    | 22 (5)    | 21 (5)    |
| VPA (min/day)       | 18 (5)       | 22 (7)    | 24 (7)    | 23 (7)    | 24 (7)    | 22 (7)    | 20 (5)    |
| MVPA (min/day)      | 38 (8)       | 45 (11)   | 46 (9)    | 47 (11)   | 46 (10)   | 44 (10)   | 41 (10)   |

PA = physical activity; SED = sedentary time; LPA = light physical activity; MPA = moderate physical activity; VPA = vigorous physical activity; MVPA = moderate- to vigorous physical activity

**Supplemental Table 5.** Mean (SD) PA levels for after school hours across age and sex using a 1-second epoch length.

|                     | Age          |           |           |           |           |           |           |
|---------------------|--------------|-----------|-----------|-----------|-----------|-----------|-----------|
|                     | 3            | 4         | 5         | 6         | 7         | 8         | 9         |
|                     | <b>Boys</b>  |           |           |           |           |           |           |
| Wear days (n)       | 8.5 (1.9)    | 8.4 (1.8) | 8.4 (2.0) | 8.9 (2.2) | 8.9 (2.2) | 8.8 (1.9) | 9.1 (1.6) |
| Wear time (min/day) | 248 (35)     | 250 (28)  | 264 (33)  | 274 (38)  | 283 (34)  | 295 (36)  | 315 (34)  |
| Total PA (cpm)      | 629 (113)    | 688 (184) | 719 (212) | 721 (262) | 693 (192) | 686 (238) | 654 (268) |
| SED (min/day)       | 174 (28)     | 177 (25)  | 187 (29)  | 197 (34)  | 206 (29)  | 220 (35)  | 240 (35)  |
| LPA (min/day)       | 51 (10)      | 49 (9)    | 50 (9)    | 50 (10)   | 49 (9)    | 47 (9)    | 47 (8)    |
| MPA (min/day)       | 12 (3)       | 12 (3)    | 13 (3)    | 13 (4)    | 14 (3)    | 14 (4)    | 14 (4)    |
| VPA (min/day)       | 10 (3)       | 12 (4)    | 13 (4)    | 14 (6)    | 14 (5)    | 15 (6)    | 15 (7)    |
| MVPA (min/day)      | 22 (6)       | 24 (6)    | 27 (7)    | 28 (9)    | 28 (8)    | 29 (9)    | 29 (10)   |
|                     | <b>Girls</b> |           |           |           |           |           |           |
| Wear days (n)       | 8.0 (1.5)    | 8.4 (1.9) | 8.7 (1.7) | 8.7 (2.0) | 9.0 (2.3) | 8.4 (1.7) | 8.7 (1.7) |
| Wear time (min/day) | 242 (30)     | 251 (30)  | 261 (29)  | 267 (30)  | 276 (34)  | 292 (34)  | 308 (44)  |
| Total PA (cpm)      | 607 (154)    | 675 (194) | 697 (214) | 652 (190) | 689 (233) | 613 (200) | 590 (171) |
| SED (min/day)       | 173 (28)     | 180 (27)  | 188 (26)  | 196 (26)  | 204 (31)  | 221 (32)  | 235 (37)  |
| LPA (min/day)       | 49 (9)       | 48 (9)    | 48 (9)    | 47 (9)    | 47 (9)    | 47 (10)   | 47 (11)   |
| MPA (min/day)       | 10 (2)       | 12 (3)    | 12 (3)    | 12 (3)    | 12 (3)    | 12 (3)    | 12 (3)    |
| VPA (min/day)       | 10 (3)       | 12 (4)    | 13 (4)    | 12 (4)    | 14 (5)    | 13 (4)    | 13 (4)    |
| MVPA (min/day)      | 20 (5)       | 23 (7)    | 24 (6)    | 24 (7)    | 26 (8)    | 25 (7)    | 25 (7)    |

PA = physical activity; SED = sedentary time; LPA = light physical activity; MPA = moderate physical activity; VPA = vigorous physical activity; MVPA = moderate- to vigorous physical activity

**Supplemental Table 6.** Mean (SD) PA levels for the total day across age and epoch length.

|                     | Age                    |            |            |            |            |            |            |
|---------------------|------------------------|------------|------------|------------|------------|------------|------------|
|                     | 3                      | 4          | 5          | 6          | 7          | 8          | 9          |
|                     | <b>1-second epoch</b>  |            |            |            |            |            |            |
| Wear days (n)       | 12.8 (1.6)             | 12.7 (1.9) | 12.5 (2.1) | 12.4 (2.8) | 12.5 (2.9) | 11.9 (2.5) | 12.2 (2.2) |
| Wear time (min/day) | 678 (45)               | 695 (36)   | 705 (37)   | 718 (46)   | 725 (42)   | 737 (41)   | 756 (45)   |
| Total PA (cpm)      | 634 (118)              | 718 (157)  | 748 (168)  | 724 (168)  | 723 (163)  | 677 (175)  | 632 (147)  |
| SED (min/day)       | 468 (41)               | 476 (38)   | 485 (40)   | 503 (47)   | 516 (43)   | 537 (46)   | 564 (47)   |
| LPA (min/day)       | 148 (20)               | 148 (17)   | 144 (18)   | 139 (18)   | 134 (16)   | 126 (19)   | 121 (17)   |
| MPA (min/day)       | 33 (6)                 | 37 (6)     | 38 (7)     | 38 (8)     | 38 (8)     | 37 (8)     | 36 (8)     |
| VPA (min/day)       | 28 (7)                 | 35 (9)     | 38 (10)    | 38 (11)    | 38 (11)    | 37 (12)    | 35 (10)    |
| MVPA (min/day)      | 61 (12)                | 71 (15)    | 76 (16)    | 76 (17)    | 76 (17)    | 74 (18)    | 71 (16)    |
|                     | <b>60-second epoch</b> |            |            |            |            |            |            |
| Wear days (n)       | 12.8 (1.6)             | 12.7 (1.9) | 12.5 (2.1) | 12.4 (2.8) | 12.5 (2.9) | 11.9 (2.5) | 12.2 (2.2) |
| Wear time (min/day) | 680 (45)               | 697 (36)   | 707 (37)   | 719 (47)   | 728 (42)   | 739 (41)   | 759 (45)   |
| Total PA (cpm)      | 631 (118)              | 715 (158)  | 745 (167)  | 721 (169)  | 721 (162)  | 674 (174)  | 629 (147)  |
| SED (min/day)       | 227 (38)               | 225 (41)   | 235 (46)   | 264 (50)   | 285 (47)   | 315 (54)   | 350 (51)   |
| LPA (min/day)       | 426 (43)               | 433 (40)   | 424 (40)   | 400 (44)   | 382 (39)   | 365 (47)   | 350 (45)   |
| MPA (min/day)       | 22 (7)                 | 31 (12)    | 37 (14)    | 44 (16)    | 47 (17)    | 45 (16)    | 46 (17)    |
| VPA (min/day)       | 7 (4)                  | 9 (6)      | 11 (7)     | 11 (8)     | 13 (8)     | 14 (10)    | 13 (8)     |
| MVPA (min/day)      | 28 (10)                | 40 (16)    | 48 (19)    | 55 (22)    | 61 (23)    | 60 (24)    | 59 (23)    |

PA = physical activity; SED = sedentary time; LPA = light physical activity; MPA = moderate physical activity; VPA = vigorous physical activity; MVPA = moderate- to vigorous physical activity

**Supplemental Table 7.** Mean (SD) PA levels for the total day across age and sex using a 60-second epoch length.

|                     | Age          |            |            |            |            |            |            |
|---------------------|--------------|------------|------------|------------|------------|------------|------------|
|                     | 3            | 4          | 5          | 6          | 7          | 8          | 9          |
|                     | <b>Boys</b>  |            |            |            |            |            |            |
| Wear days (n)       | 12.9 (1.5)   | 12.7 (1.8) | 12.3 (2.1) | 12.6 (3.0) | 12.4 (2.8) | 12.1 (2.6) | 12.4 (2.1) |
| Wear time (min/day) | 690 (40)     | 697 (32)   | 711 (38)   | 729 (52)   | 731 (45)   | 743 (42)   | 763 (41)   |
| Total PA (cpm)      | 638 (100)    | 740 (162)  | 771 (182)  | 751 (181)  | 739 (167)  | 718 (187)  | 654 (172)  |
| SED (min/day)       | 226 (37)     | 221 (40)   | 229 (46)   | 263 (54)   | 284 (47)   | 310 (57)   | 353 (57)   |
| LPA (min/day)       | 435 (41)     | 433 (43)   | 430 (42)   | 406 (45)   | 382 (40)   | 365 (44)   | 345 (41)   |
| MPA (min/day)       | 23 (7)       | 34 (12)    | 42 (17)    | 49 (18)    | 52 (19)    | 52 (18)    | 51 (18)    |
| VPA (min/day)       | 5 (4)        | 9 (6)      | 11 (7)     | 11 (9)     | 13 (9)     | 16 (13)    | 14 (9)     |
| MVPA (min/day)      | 28 (9)       | 42 (16)    | 52 (22)    | 60 (24)    | 65 (26)    | 68 (28)    | 65 (26)    |
|                     | <b>Girls</b> |            |            |            |            |            |            |
| Wear days (n)       | 12.7 (1.7)   | 12.8 (1.9) | 12.6 (2.2) | 12.3 (2.6) | 12.6 (3.0) | 11.8 (2.4) | 12.0 (2.3) |
| Wear time (min/day) | 667 (49)     | 698 (40)   | 704 (36)   | 710 (41)   | 724 (38)   | 735 (41)   | 753 (50)   |
| Total PA (cpm)      | 623 (140)    | 690 (150)  | 717 (146)  | 692 (152)  | 701 (156)  | 631 (149)  | 601 (104)  |
| SED (min/day)       | 228 (39)     | 228 (41)   | 242 (46)   | 265 (46)   | 285 (47)   | 319 (50)   | 346 (43)   |
| LPA (min/day)       | 413 (43)     | 433 (37)   | 419 (38)   | 395 (43)   | 383 (40)   | 365 (50)   | 355 (50)   |
| MPA (min/day)       | 19 (7)       | 29 (12)    | 33 (10)    | 39 (13)    | 42 (13)    | 39 (11)    | 40 (12)    |
| VPA (min/day)       | 8 (5)        | 9 (6)      | 11 (7)     | 10 (7)     | 13 (8)     | 12 (7)     | 12 (5)     |
| MVPA (min/day)      | 27 (11)      | 38 (16)    | 43 (15)    | 50 (18)    | 55 (19)    | 51 (16)    | 52 (16)    |

PA = physical activity; SED = sedentary time; LPA = light physical activity; MPA = moderate physical activity; VPA = vigorous physical activity; MVPA = moderate- to vigorous physical activity

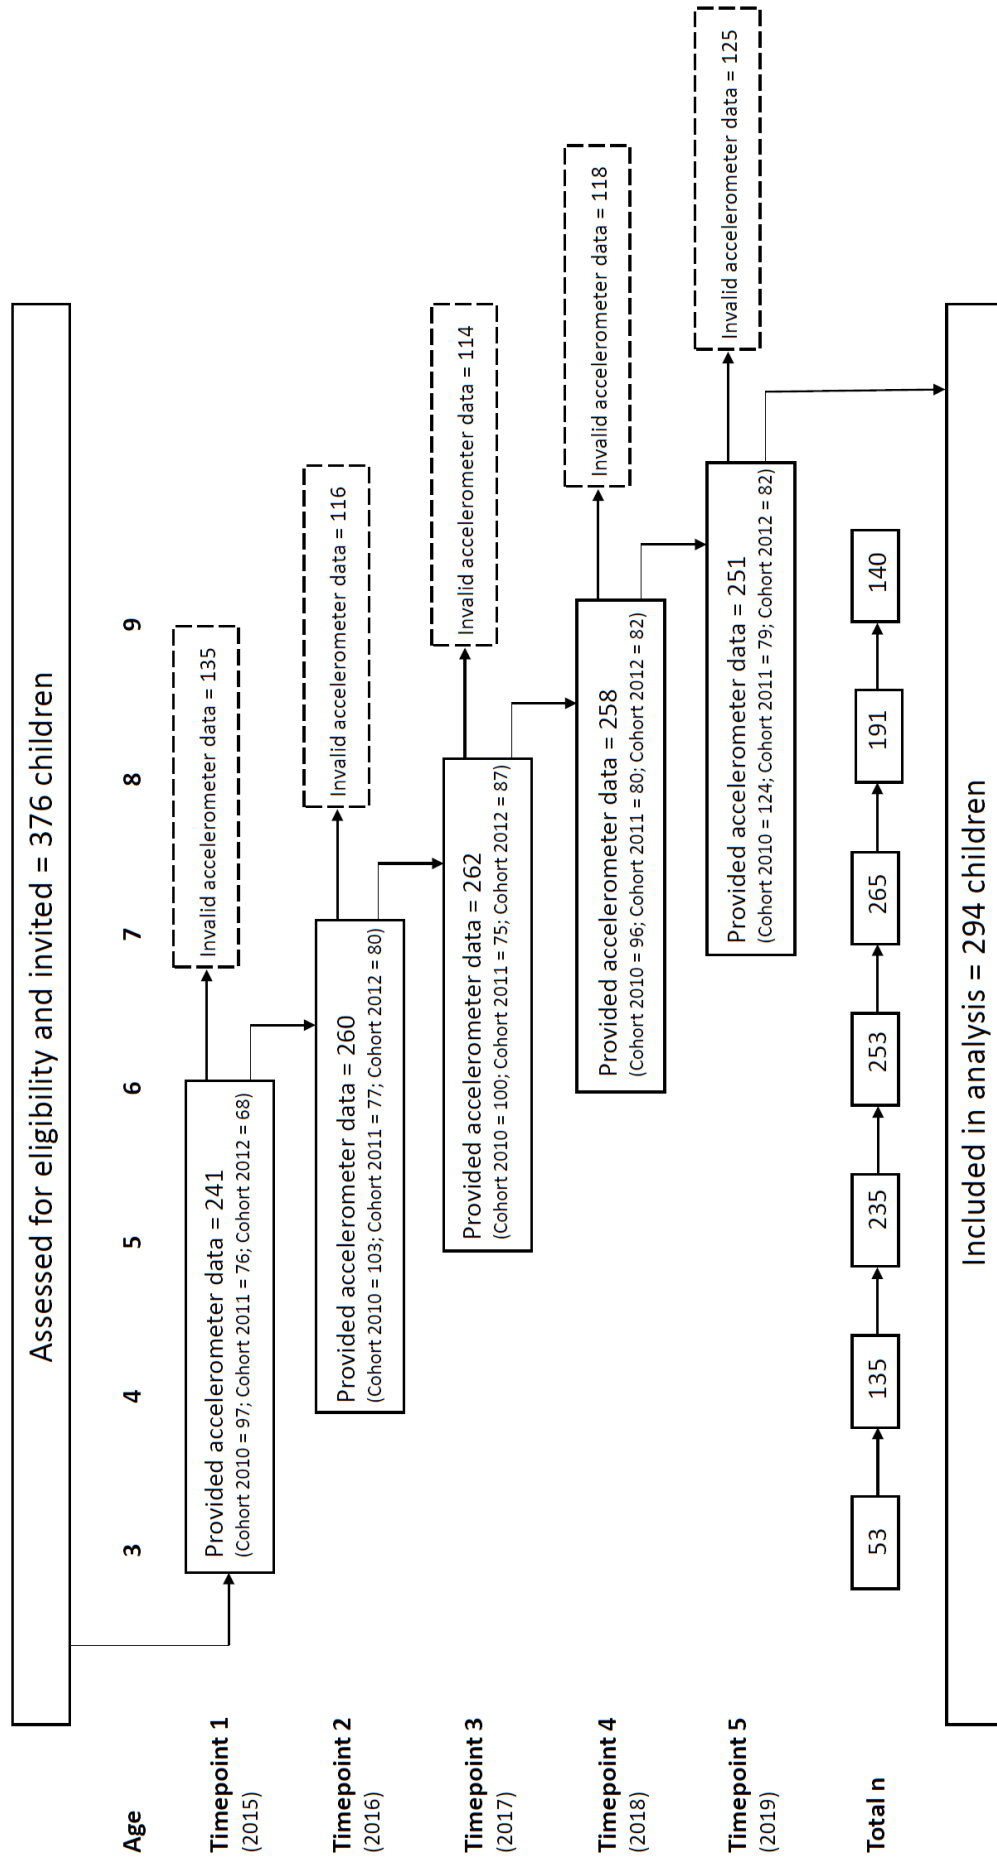

**Supplemental Figure 1. Flow chart showing the number of children providing data across the follow-up period.** 3 cohorts of children (born 2010, 2011, and 2012) provided data on 5 timepoints. Children providing valid data for all analysed contexts ( $\geq 3$  weekdays,  $\geq 1$  weekend day,  $\geq 3$  weekday preschool/school hours, and  $\geq 3$  weekday after school hours) for at least 2 timepoints were included in the analysis.



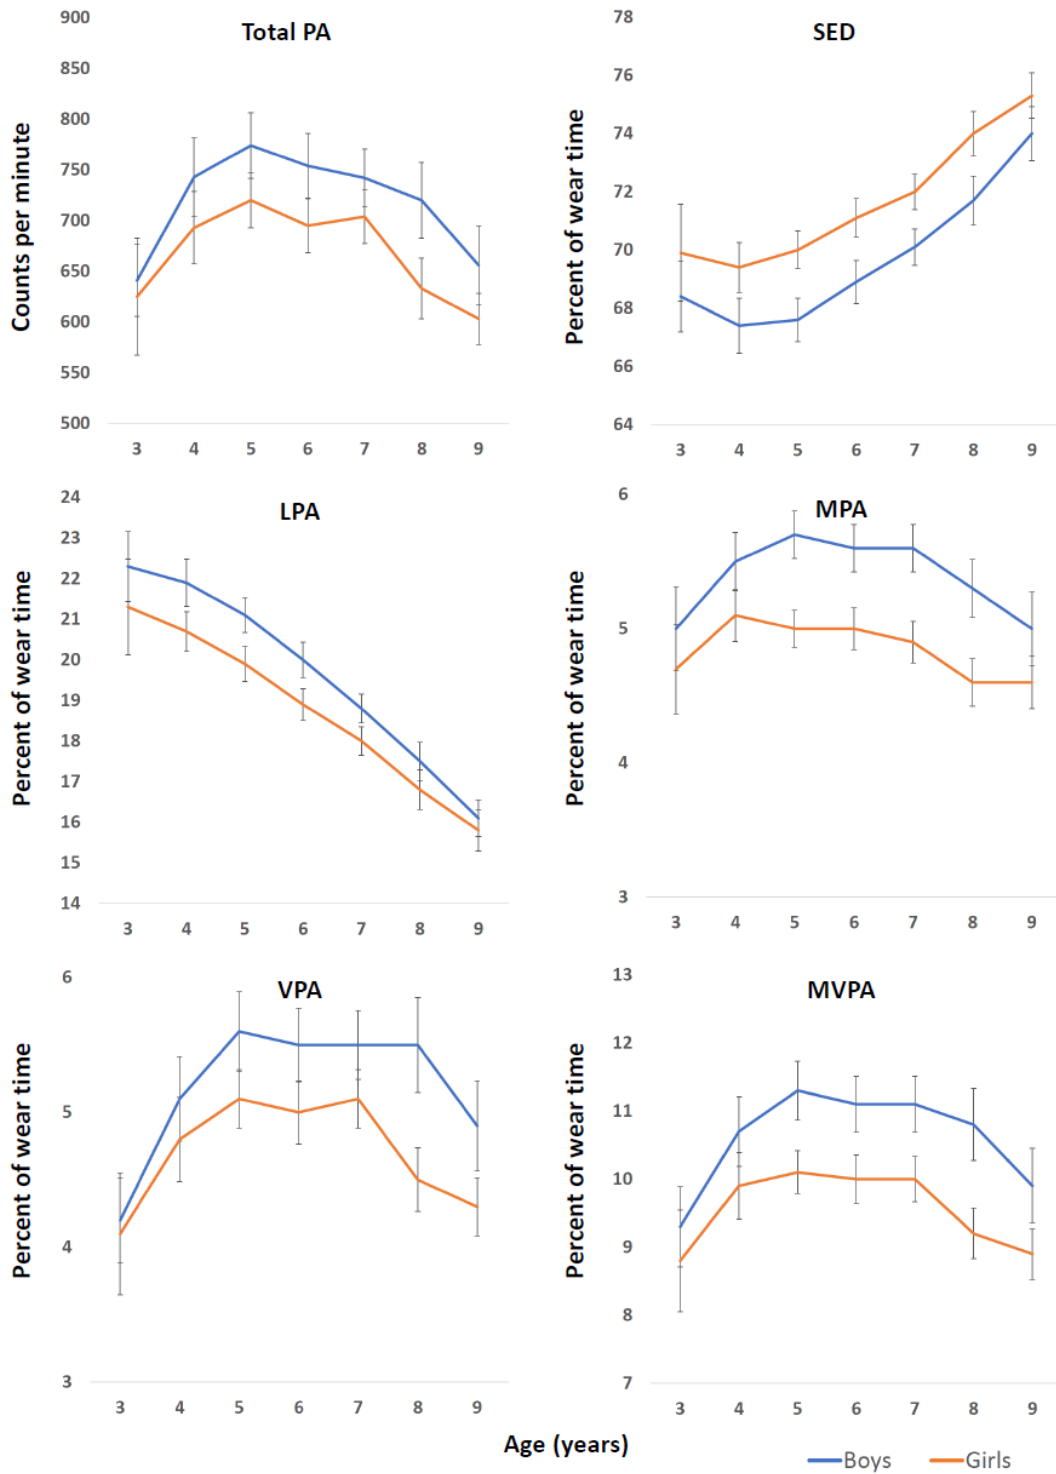

**Supplemental Figure 2. Trajectories (means and 95% confidence intervals) for physical activity and sedentary time proportions (percent of valid wear time) in boys and girls aged 3–9 years using a 1-second epoch.** PA = physical activity; SED = sedentary time; LPA = light physical activity; MPA = moderate physical activity; VPA = vigorous physical activity; MVPA = moderate- to vigorous physical activity

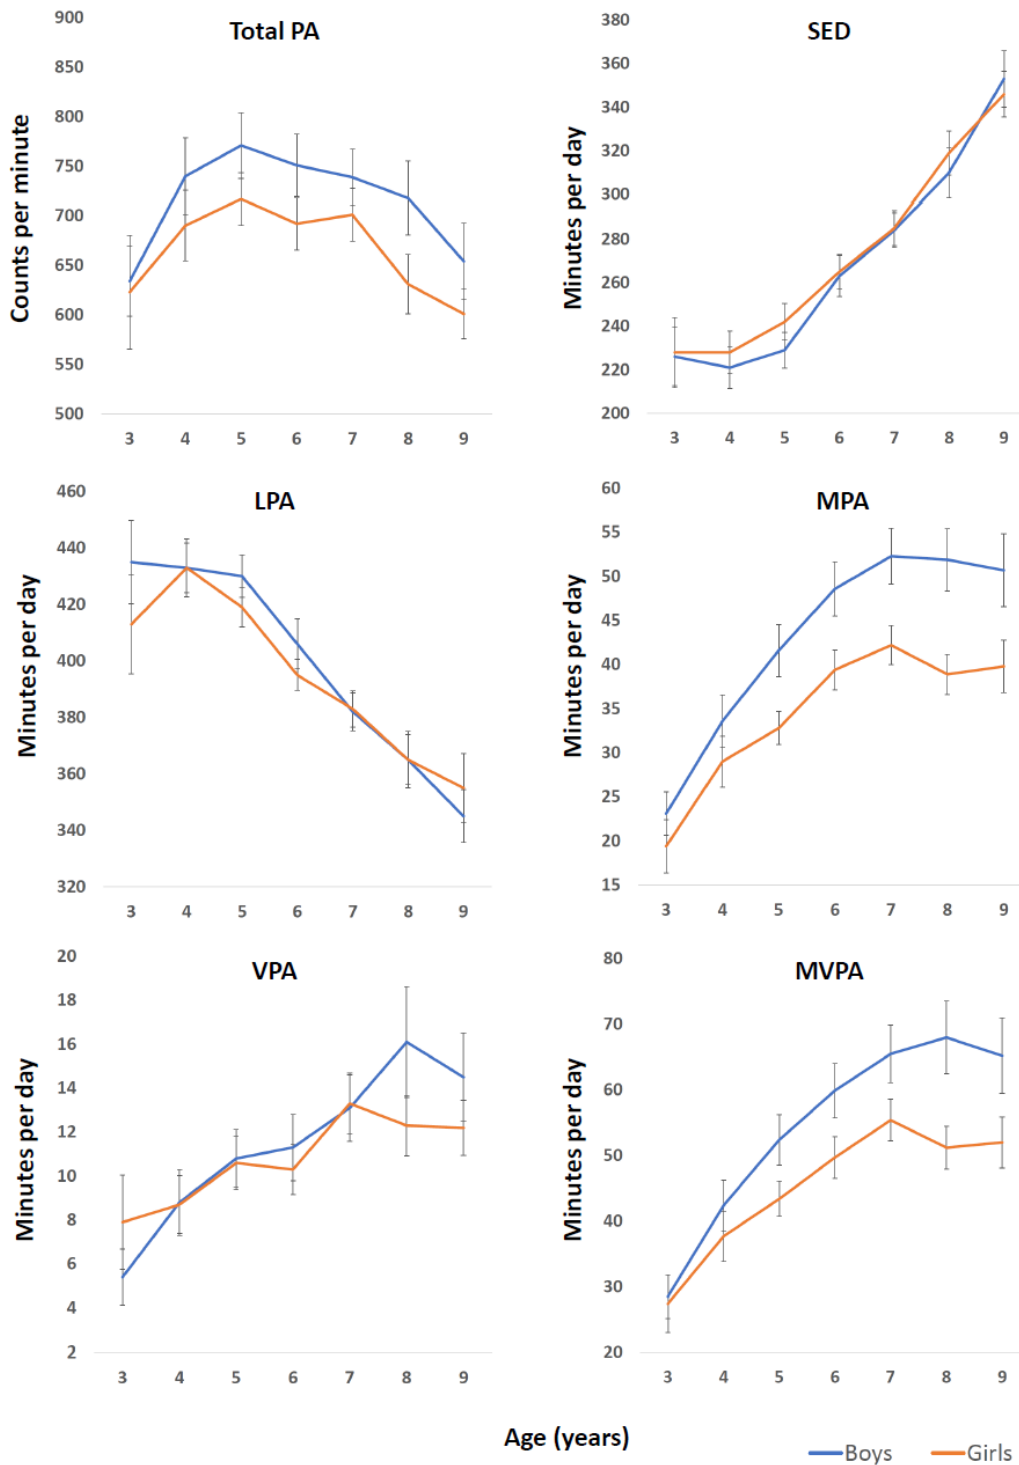

**Supplemental Figure 3. Trajectories (means and 95% confidence intervals) for physical activity and sedentary time in boys and girls aged 3–9 years using a 60-second epoch.** PA = physical activity; SED = sedentary time; LPA = light physical activity; MPA = moderate physical activity; VPA = vigorous physical activity; MVPA = moderate- to vigorous physical activity
